# Supplementary material
Source: PubMed Central journal article supplement (PMC1851811)
Supplement: plntphys_pp.106.090803_3.pdf [file plntphys_pp.106.090803_3.pdf]

**Table S1.** Sequences of tryptic fragments obtained by LC-MS/MS analysis

| Molecular mass (kDa) | Code SwissProt/AGI | Name    | Score | Sequence coverage (%) | Aa position <sup>c</sup> | Peptide sequences <sup>d</sup> |
|----------------------|--------------------|---------|-------|-----------------------|--------------------------|--------------------------------|
| 35 <sup>a</sup>      | Q9LUL7/At3g14310   | AtPME3  | 180   | 9                     | 294 - 309                | TVAAAVAAAPENSNKR               |
|                      |                    |         |       |                       | 342 - 348                | TIITGSR                        |
|                      |                    |         |       |                       | 349 - 368                | NVVDGSTTFHSATVAAVGER           |
|                      |                    |         |       |                       | 479 - 489                | IGATSDLQSVK                    |
| 22 <sup>a</sup>      | Q9LUV1/At3g17220   | AtPMEI2 | 105   | 14                    | 80 - 85                  | IQSLVK                         |
|                      |                    |         |       |                       | 105 - 114                | SAISSLNDAK                     |
|                      |                    |         |       |                       | 105 - 123                | SAISSLNDAKQSLASGDGK            |
| 35 <sup>b</sup>      | Q9LUL7/AT3g14310   | AtPME3  | 571   | 21                    | 280 - 293                | ADATVAADGSGTFFK                |
|                      |                    |         |       |                       | 310 - 315                | YVIHIK                         |
|                      |                    |         |       |                       | 316 - 327                | AGVYRENVEVAK                   |
|                      |                    |         |       |                       | 321 - 327                | ENVEVAK                        |
|                      |                    |         |       |                       | 331 - 339                | NIMFMGDGR                      |
|                      |                    |         |       |                       | 342 - 348                | TIITGSR                        |
|                      |                    |         |       |                       | 373 - 384                | DITFQNTAGPSK                   |
|                      |                    |         |       |                       | 385 - 391                | HQAVALLR                       |
|                      |                    |         |       |                       | 456 - 463                | NMVTAQGR                       |
|                      |                    |         |       |                       | 464 - 476                | TDPNQNTGIVIQK                  |
| 479 - 489            | IGATSDLQSVK        |         |       |                       |                          |                                |
| 490 - 501            | GSFPTYLGRPWK       |         |       |                       |                          |                                |
| 538 - 551            | EYSNTGAGAGTANR     |         |       |                       |                          |                                |
| 17 <sup>b</sup>      | Q9LNF2/ At1g48020  | AtPMEI1 | 159   | 21                    | 47 - 51                  | FLNTK                          |
|                      |                    |         |       |                       | 52 - 62                  | FASPNLQALAK                    |
|                      |                    |         |       |                       | 63 - 71                  | TTL DSTQAR                     |
|                      |                    |         |       |                       | 79 - 90                  | LQSIIDGGVDPR                   |
| 34 <sup>a,b</sup>    | Q9SKX2/At2g43050   | AtPME   | 49    | 1                     | 389 - 396                | NFVTAQGR                       |

<sup>a</sup>Proteins obtained from *AtPMEI-2* transformed plants. <sup>b</sup>Proteins obtained from *AtPMEI-1* transformed plants. <sup>c</sup>Amino acid position of fragment in the sequence. <sup>d</sup>Peptide sequence obtained after tryptic digestion
