# Supplementary material
Source: PubMed Central journal article supplement (PMC1851811)
Supplement: plntphys_pp.106.090803_4.pdf [file plntphys_pp.106.090803_4.pdf]

## **SUPPLEMENTAL MATERIAL**

**Figure S1.** Quantification of PME activity in different tissue from WT plants with radial gel diffusion assay.

**Figure S2.** Immunodetection of AtPMEI-1 and AtPMEI-2 in transformed leaf extracts after gel filtration.

**Table S1.** Sequences of tryptic fragments obtained by LC-MS/MS analysis.
