# Supplementary material
Source: PubMed Central journal article supplement (PMC1851811)

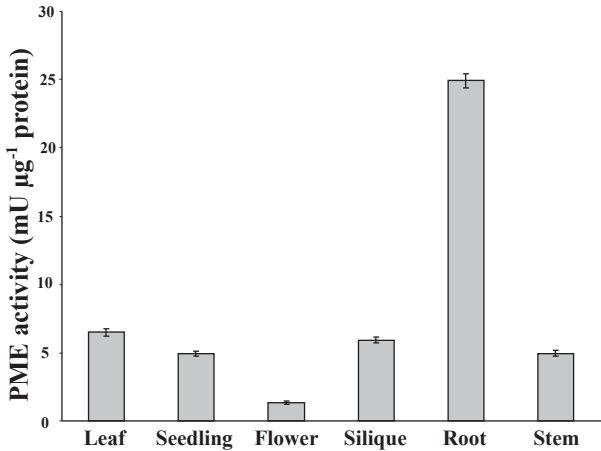

Supplement: plntphys_pp.106.090803_1.pdf [file plntphys_pp.106.090803_1.pdf]

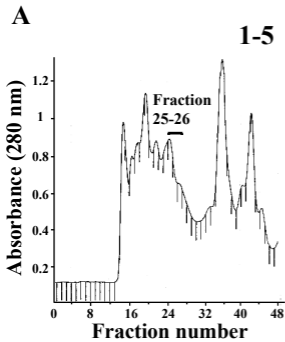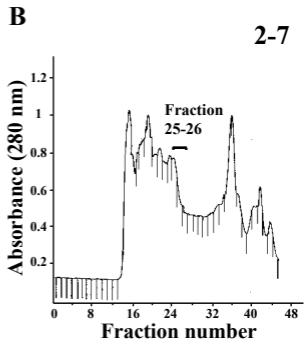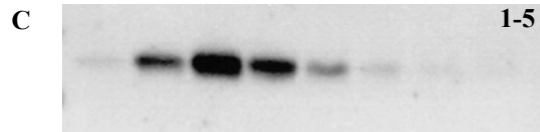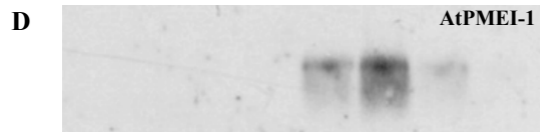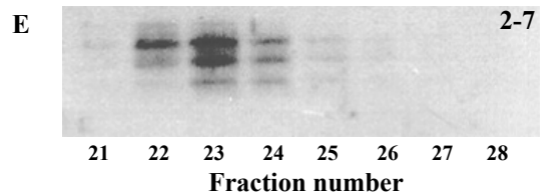

Supplement: plntphys_pp.106.090803_2.pdf [file plntphys_pp.106.090803_2.pdf]
